# Supplementary material for: Polydimethylsiloxane Elastomers Filled with Rod-Like α-MnO2 Nanoparticles: An Interplay of Structure and Electrorheological Performance
Source: MDPI journal article supplement (doi:10.3390/polym12122810), 2020-11-27
Supplement: s1 [file s1]

# Polydimethylsiloxane elastomers filled with rod-like $\alpha$ -MnO<sub>2</sub> nanoparticles: An interplay of structure and electrorheological performance

Alexander V. Agafonov<sup>1,2</sup>, Anton S. Kraev<sup>1</sup>, Anastasia A. Egorova<sup>3</sup>, Alexander E. Baranchikov<sup>3</sup>, Sergey A. Kozyukhin<sup>3</sup>, Vladimir K. Ivanov<sup>3,4\*</sup>

<sup>1</sup> Krestov Institute of Solution Chemistry of the Russian Academy of Sciences, Ivanovo, 153045, Russia; ava@isc-ras.ru

<sup>2</sup> National Research Tomsk State University, Tomsk, 634050, Russia

<sup>3</sup> Kurnakov Institute of General and Inorganic Chemistry of the Russian Academy of Sciences, Moscow, 119991, Russia; a.baranchikov@yandex.ru

<sup>4</sup> National Research University Higher School of Economics, Moscow, 101000, Russia

\* Correspondence: van@igic.ras.ru

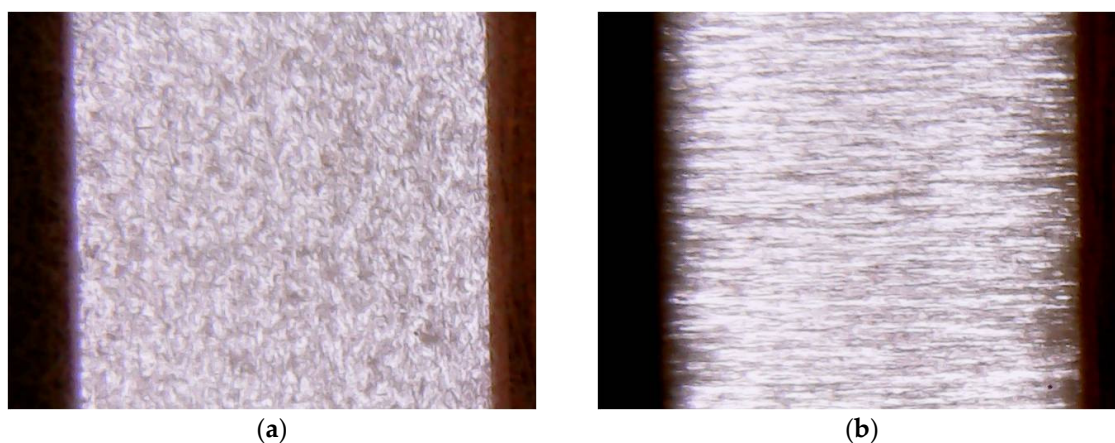

**Figure S1.** The appearance of  $\alpha$ -MnO<sub>2</sub> suspension at 40 $\times$  magnification in uncured polydimethylsiloxane between the electrodes (a) in the absence and (b) in the presence of an electric field. The interelectrode gap was 1 mm.
